# Supplementary material for: Trends in Unhealthy Lifestyle Factors among Adults with Stroke in the United States between 1999 and 2018
Source: MDPI journal article supplement (doi:10.3390/jcm12031223), 2023-02-03
Supplement: s1 [file s1]

**Supplemental Table S1.** Characteristics of respondents and no-respondents

| Characteristics                                                              | Respondents     | No-respondents  | <i>p</i> |
|------------------------------------------------------------------------------|-----------------|-----------------|----------|
|                                                                              | n=2,017         | n=180           |          |
| <b>Age % (95% CI)</b>                                                        |                 |                 | <0.001   |
| 20-44 yr                                                                     | 5.9(4.9-7)      | 1.1(-0.4-2.6)   |          |
| 45-64 yr                                                                     | 30.8(28.8-32.9) | 14.4(9.3-19.6)  |          |
| ≥65 yr                                                                       | 63.2(61.1-65.3) | 84.4(79.1-89.7) |          |
| <b>Sex % (95% CI)</b>                                                        |                 |                 | 0.47     |
| Male                                                                         | 49.5(47.3-51.7) | 46.7(39.4-54)   |          |
| Female                                                                       | 50.5(48.3-52.7) | 53.3(46-60.6)   |          |
| <b>Race/ethnicity % (95% CI)†</b>                                            |                 |                 | 0.046    |
| Non-Hispanic White                                                           | 50.5(48.3-52.7) | 60.6(53.4-67.7) |          |
| Non-Hispanic Black                                                           | 26.8(24.9-28.8) | 18.3(12.7-24)   |          |
| Hispanic                                                                     | 5.1(4.1-6)      | 4.4(1.4-7.5)    |          |
| Other (Non-Hispanic Asian ,Mexican-American, multi- racial, and other race)‡ | 17.6(15.9-19.3) | 16.7(11.2-22.1) |          |
| <b>Ratio of family income to poverty level % (95% CI)</b>                    |                 |                 | 0.077    |
| <1.30                                                                        | 36.6(34.5-38.7) | 28.9(22.3-35.5) |          |

|                                     |                 |                 |       |
|-------------------------------------|-----------------|-----------------|-------|
| 1.30-3.49                           | 46.8(44.6-49)   | 50(42.7-57.3)   |       |
| ≥3.50                               | 16.6(14.9-18.2) | 21.1(15.1-27.1) |       |
| <b>Education level % (95% CI)</b>   |                 |                 | 0.136 |
| Below High School                   | 38.3(36.2-40.4) | 45(37.7-52.3)   |       |
| High School graduate or GED         | 25.7(23.8-27.6) | 22.2(16.1-28.3) |       |
| Some college or above 45            | 35.8(33.7-37.9) | 30.6(23.8-37.3) |       |
| <b>Marital status % (95% CI)</b>    |                 |                 | 0.011 |
| Married or living with partner 16   | 50.3(48.1-52.5) | 40.6(33.4-47.7) |       |
| Never married 5                     | 7.8(6.7-9)      | 5.6(2.2-8.9)    |       |
| Widowed, divorced, or separated 234 | 40.9(38.7-43)   | 51.7(44.4-59)   |       |
| <b>Employment status % (95% CI)</b> |                 |                 | 0.016 |
| Employed                            | 14.3(12.8-15.9) | 7.8(3.9-11.7)   |       |
| Unemployed                          | 85.7(84.1-87.2) | 91.7(87.6-95.7) |       |

---

† Race or ethnic group were reported by the participants.

‡ Representative information for non-Hispanic Asian Americans was available in the NHANES only from 2011 through 2018.

CI, confidence interval; GED, General Equivalent Diploma.

**Supplemental Table S2.** Age-Standardized Prevalence of Unhealthy Lifestyle Behaviors Among U.S. Adults with a History of Stroke, 1999–2018

|                         |  | Adults with stroke, % (95% CI) |                     |                     |                     |                     |                     |                     |                     |                     |                     |
|-------------------------|--|--------------------------------|---------------------|---------------------|---------------------|---------------------|---------------------|---------------------|---------------------|---------------------|---------------------|
|                         |  | 1999-2000                      | 2001-2002           | 2003-2004           | 2005-2006           | 2007-2008           | 2009-2010           | 2011-2012           | 2013-2014           | 2015-2016           | 2017-2018           |
| Current smoking         |  | 26.1<br>(13.7-38.6)            | 26.8<br>(15.1-38.6) | 23.3<br>(16.5-30.1) | 22.6<br>(16.2-29.1) | 26.1<br>(18.7-33.5) | 19.8<br>(15.2-24.5) | 27.8<br>(20.1-35.4) | 22.2<br>(15.0-29.4) | 24.0<br>(11.3-36.6) | 25.5<br>(19.4-31.6) |
| Current alcohol drinker |  | 39.3<br>(29.8-48.7)            | 33.7<br>(22.3-45.1) | 33.8<br>(25.2-42.5) | 43.0<br>(33.8-52.1) | 32.5<br>(21.1-43.9) | 40.6<br>(31.4-49.7) | 36.2<br>(27.3-45.1) | 49.9<br>(39.0-60.9) | 49.9<br>(41.1-58.6) | 57.4<br>(45.7-69.0) |
| Depression*             |  | -                              | -                   | -                   | 13.5<br>(8.6-18.4)  | 14.3<br>(10.2-18.3) | 13.4<br>(5.7-21.1)  | 15.0<br>(8.3-21.8)  | 14.6<br>(8.7-20.4)  | 11.8<br>(7.4-16.1)  | 22.3<br>(14.6-30.0) |
| Unhealthy diet          |  | 44.5<br>(32.4-56.5)            | 42.0<br>(32.8-51.3) | 39.7<br>(31.1-48.2) | 40.8<br>(30.7-50.9) | 39.2<br>(30.5-47.8) | 31.1<br>(23.4-38.9) | 29.0<br>(17.5-40.4) | 36.1<br>(24.1-48.1) | 33.9<br>(21.1-46.7) | 42.0<br>(31.4-52.7) |
| Obesity                 |  | 39.2<br>(28.3-50.2)            | 31.3<br>(21.6-41.0) | 35.4<br>(25.4-45.4) | 41.8<br>(30.7-53.0) | 36.5<br>(29.4-43.6) | 41.7<br>(36.3-47.1) | 37.6<br>(27.5-47.8) | 34.8<br>(24.3-45.2) | 47.8<br>(36.9-58.6) | 49.4<br>(38.9-59.8) |
| Physical inactivity†    |  | -                              | -                   | -                   | -                   | 70.4<br>(64.4-76.3) | 60.8<br>(52.6-69.0) | 60.9<br>(52.6-69.1) | 63.0<br>(52.7-73.3) | 56.9<br>(44.6-69.2) | 55.1<br>(46.1-64.2) |
| Sedentary behavior†     |  | -                              | -                   | -                   | -                   | 43.1<br>(34.0-52.2) | 42.9<br>(37.9-48.0) | 50.6<br>(43.3-58.0) | 60.5<br>(51.7-69.3) | 44.4<br>(35.6-53.3) | 36.5<br>(30.1-42.8) |

CI, confidence interval.

\*Information for depression was available from 2005-2006 through 2017-2018.

†Information for physical inactivity and sedentary behavior was available from 2007-2008 through 2017-2018.

**Supplemental Table S3:** Mean PHQ-9 Score, AHA Score, BMI, Physical Activity and Sitting Time in Adults with a History of Stroke, 1999-2018.

|                         | Adults with stroke, mean (95% CI) |                     |                     |                     |                        |                        |                        |                        |                        |                        |
|-------------------------|-----------------------------------|---------------------|---------------------|---------------------|------------------------|------------------------|------------------------|------------------------|------------------------|------------------------|
|                         | 1999-2000                         | 2001-2002           | 2003-2004           | 2005-2006           | 2007-2008              | 2009-2010              | 2011-2012              | 2013-2014              | 2015-2016              | 2017-2018              |
| PHQ-9 score*            | -                                 | -                   | -                   | 4.5<br>(3.7-5.4)    | 5.3<br>(4.6-6.0)       | 4.8<br>(3.5-6.1)       | 4.5<br>(3.2-5.8)       | 4.8<br>(3.9-5.8)       | 4.8<br>(4.2-5.3)       | 5.8<br>(4.7-6.9)       |
| AHA diet score          | 19.9<br>(18.5-21.2)               | 19.1<br>(17.1-21.0) | 20.4<br>(18.5-22.3) | 20.4<br>(18.6-22.2) | 20.7<br>(19.5-21.9)    | 22.7<br>(21.4-23.9)    | 20.8<br>(19.2-22.5)    | 21.6<br>(20.3-22.9)    | 19.8<br>(17.2-22.4)    | 21.9<br>(20.6-23.3)    |
| BMI                     | 29.7<br>(28.3-31.0)               | 29.4<br>(28.3-30.5) | 29.0<br>(27.8-30.3) | 30.2<br>(29.0-31.4) | 29.3<br>(28.5-30.0)    | 30.5<br>(29.6-31.3)    | 28.6<br>(27.0-30.2)    | 29.2<br>(27.6-30.8)    | 30.8<br>(29.3-32.3)    | 30.9<br>(29.8-32.1)    |
| Physical activity time† | -                                 | -                   | -                   | -                   | 343.6<br>(194.2-492.9) | 435.2<br>(252.8-617.7) | 409.8<br>(204.6-614.9) | 424.1<br>(285.1-563.1) | 593.9<br>(250.5-937.3) | 502.3<br>(381.4-623.3) |
| Sitting time†           | -                                 | -                   | -                   | -                   | 6.4<br>(5.9-6.9)       | 6.6<br>(6.1-7.0)       | 7.2<br>(6.5-7.9)       | 7.8<br>(7.1-8.4)       | 7.2<br>(6.4-7.9)       | 6.4<br>(5.8-7.1)       |

\*PHQ-9 score for depression was available from 2005-2006 through 2017-2018.

†Physical activity and sitting times were available from 2007-2008 through 2017-2018. Physical activity times was expressed by equivalent physical activity times (moderate activity time+2×vigorous activity time).

AHA, American Heart Association; BMI, body-mass index; CI, confidence interval; NHANES, National Health and Nutrition Examination Survey; PHQ, Patient Health Questionnaire.

**Supplemental Table S4:** Annual Rate of Change Before and After Inflection Point in Unhealthy Lifestyles Among Adults with a History of Stroke, 1999–2018

|                         | Inflection point | Annual rate of change before inflection, %/year (95% CI) | Annual rate of change after inflection, %/year (95% CI) | Average annual percentage change |
|-------------------------|------------------|----------------------------------------------------------|---------------------------------------------------------|----------------------------------|
| Current Smoker          | -                | -                                                        | -                                                       | 0.3 (-3.1,3.8)                   |
| Current alcohol drinker | -                | -                                                        | -                                                       | 4.9 (1.6-8.2)*                   |
| Depression              | -                | -                                                        | -                                                       | 4.4 (-4.7,14.4)                  |
| Unhealthy diet          | 2011-2012        | -5.9 (-10.1,-1.5)*                                       | 9.0 (-7.1,28.1)                                         | -1.2 (-5.7,3.6)                  |
| Obesity                 | -                | -                                                        | -                                                       | 3.4 (0.4,6.4)*                   |
| Physical inactivity†    | -                | -                                                        | -                                                       | -4.5 (-7.5,-1.3)*                |
| Sedentary behavior†     | 2013-2014        | 14.2<br>(-46.7,144.6)                                    | -21.5<br>(-84.6,301.6)                                  | -1.7 (-13.0,11.2)                |

CI, confidence interval

\* p<0.05
